# Supplementary material for: Regioselective photo-oxidation of 1-benzyl-4,9-dihydro-3H-β-carbolines
Source: Royal Society of Chemistry journal article supplement (doi:10.1039/b604922b), 2006-01-01
Supplement: b604922b.pdf [file b604922b.pdf]

## Spectroscopic data for compounds **5** and **6**.

All compounds were synthesised as described in the communication (table 1, footnote 11). NMR spectra were recorded on a Bruker DPX 300 ( $^1\text{H}$ , 300.13 MHz;  $^{13}\text{C}$ , 75.47 MHz) spectrometer. Chemical shifts were measured relative to chloroform ( $^{13}\text{C}$   $\delta$  77.0) or dimethylsulfoxide ( $^{13}\text{C}$   $\delta$  39.5) and are expressed in ppm. Coupling constants  $J$  are expressed in Hertz and the measured values are corrected to one decimal place. Fast Atom Bombardment (FAB) mass spectra were recorded on a Kratos Concept 1H using xenon and *m*-nitrobenzyl alcohol as the matrix. Electrospray (ES) mass spectra were recorded on a Micromass Quattro LC spectrometer. Accurate mass was measured on a Kratos Concept 1H spectrometer using peak matching to a stable reference peak. Melting points were recorded on a Reichert Kofler thermopan and are uncorrected.

### 1) 1-Benzoyl-3,4-dihydro- $\beta$ -carboline **5a**:

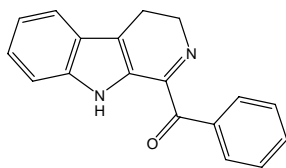

Red sticky gum;  $\nu_{\text{max}}/\text{cm}^{-1}$  3447, 1656, 1539, 1316, 1189, 1173, 954, 743, 789, 728;  $^1\text{H-NMR}$  (300 MHz,  $\text{CDCl}_3$ )  $\delta$  3.03 (2H, t,  $J$  8.8), 4.18 (2H, t,  $J$  8.8), 7.18 (1H, t,  $J$  7.6), 7.32 (1H, t,  $J$  7.6), 7.40 (1H, d,  $J$  8.2), 7.49 (2H, t,  $J$  7.7), 7.58-7.66 (2H, m), 8.19 (2H, d,  $J$  7.3 Hz), 9.51 (br s, 1H,  $\text{D}_2\text{O}$  exch,  $\text{NH}$ );  $^{13}\text{C-NMR}$  (75MHz,  $\text{CDCl}_3$ )  $\delta$  19.1 ( $\text{CH}_2$ ), 49.3 ( $\text{CH}_2$ ), 112.4 (CH), 118.1 (Cq), 120.0 (CH), 120.3 (CH), 124.8 (Cq), 125.2 (CH), 126.7 (Cq), 128.3 (CH), 131.1 (CH), 133.5 (CH), 135.4 (Cq), 137.0 (Cq), 155.9 (Cq), 193.4 (CO);  $m/z$  ( $\text{ES}^+$ ) 275 ( $\text{MH}^+$ );  $m/z$  ( $\text{FAB}^+$ ) 275 ( $\text{MH}^+$ ) (found:  $\text{MH}^+$ , 275.11836.  $\text{C}_{18}\text{H}_{15}\text{N}_2\text{O}$  requires 275.11841).

2) 1-(2-Fluorobenzoyl)-3,4-dihydro- $\beta$ -carboline **5b**:

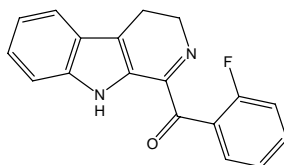

Bright yellow solid, mp 129-130 (from EtOH/H<sub>2</sub>O); Found: C, 73.88; H, 4.34; N, 9.41 %. Calc. for C<sub>18</sub>H<sub>13</sub>FN<sub>2</sub>O: C, 73.96; H, 4.48; N, 9.58 %;  $\nu_{\max}/\text{cm}^{-1}$  3450, 1674, 1609, 1186, 959, 762, 751;  $\delta_{\text{H}}$  (CDCl<sub>3</sub>; Me<sub>4</sub>Si) 3.02 (2H, t, *J* 8.9), 4.14 (2H, t, *J* 8.9), 7.12-7.20 (2H, m), 7.23-7.35 (2H, m), 7.44 (1H, d, *J* 8.2), 7.51-7.58 (1H, m), 7.62 (1H, d, *J* 8.2), 7.73 (1H, t, *J* 7.3), 9.42 (1H, br s, D<sub>2</sub>O exch, NH). <sup>13</sup>C-NMR (75MHz, CDCl<sub>3</sub>)  $\delta$  19.0 (CH<sub>2</sub>), 49.5 (CH<sub>2</sub>), 112.35 (CH), 116.3 (d, <sup>2</sup>*J*<sub>CF</sub> 8.4 Hz, CH), 118.1 (Cq), 120.0 (CH), 120.4 (CH), 123.6, (d, <sup>3</sup>*J*<sub>CF</sub> 3.6 Hz, CH), 124.7 (Cq), 125.2 (CH), 125.4 (d, <sup>2</sup>*J*<sub>CF</sub> 13.2 Hz, Cq), 126.1 (Cq), 131.4 (d, <sup>4</sup>*J*<sub>CF</sub> 2.4 Hz, CH), 134.0 (d, <sup>3</sup>*J*<sub>CF</sub> 8.4 Hz, CH), 137.1 (Cq), 155.8 (Cq), 161.0 (d, <sup>1</sup>*J*<sub>CF</sub> 255.0 Hz, Cq), 193.5 (CO); *m/z* (ES<sup>+</sup>) 293 (MH<sup>+</sup>); *m/z* (FAB<sup>+</sup>) 293 (MH<sup>+</sup>) (found: MH<sup>+</sup>, 293.10905; C<sub>18</sub>H<sub>14</sub>FN<sub>2</sub>O requires 292.10899).

3) 1-(2-Chlorobenzoyl)-3,4-dihydro- $\beta$ -carboline **5c**:

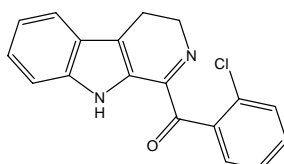

Orange solid, mp 120-121 °C (from acetone/H<sub>2</sub>O); Found: C, 69.94; H, 4.15; N, 8.91 %. Calc. for C<sub>18</sub>H<sub>13</sub>ClN<sub>2</sub>O: C, 70.02; H, 4.24; N, 9.07 %;  $\nu_{\max}/\text{cm}^{-1}$  3400, 1678, 1539, 1214, 1192, 956, 746, 731; <sup>1</sup>H-NMR (300 MHz, CDCl<sub>3</sub>)  $\delta$  3.00 (2H, t, *J* 8.8), 4.13 (2H, t, *J* 8.8), 7.17 (1H, t, *J* 7.0), 7.30-7.40 (2H, m), 7.43-7.47 (3H, m), 7.55 (1H, dt, *J* 1.2 and 7.0), 7.61 (1H, dd, *J* 0.9 and 8.2), 9.47 (1H, br s, D<sub>2</sub>O exch, NH); <sup>13</sup>C-NMR (75MHz, CDCl<sub>3</sub>)  $\delta$  18.9 (CH<sub>2</sub>), 49.7 (CH<sub>2</sub>), 112.4 (CH), 118.3 (Cq), 120.0 (CH), 120.4 (CH), 124.7 (Cq), 125.3 (CH), 126.1 (Cq), 126.5 (CH), 130.1 (CH), 130.2 (CH), 132.0 (CH), 132.1 (Cq), 137.1 (Cq), 137.2 (Cq), 155.8 (Cq), 195.8 (CO); *m/z* (ES<sup>+</sup>) 309 (MH<sup>+</sup>); *m/z* (FAB<sup>+</sup>) 309 (MH<sup>+</sup>) (found: MH<sup>+</sup>, 309.07947; C<sub>18</sub>H<sub>14</sub>ClN<sub>2</sub>O requires 308.07944).

4) 1-(2-Bromobenzoyl)-3,4-dihydro- $\beta$ -carboline **5d**:

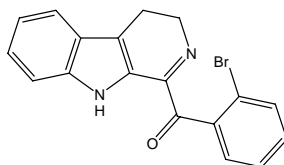

Orange solid, mp 136-137 °C (from EtOH); Found: C, 61.14; H, 3.72; N, 7.88 %. Calc. for  $C_{18}H_{13}BrN_2O$ : C, 61.21; H, 3.71; N, 7.93 %;  $\nu_{max}/cm^{-1}$  3453, 1660, 1585, 1539, 1437, 1295, 1222, 1143, 732;  $^1H$ -NMR (300 MHz,  $CDCl_3$ )  $\delta$  3.0 (2H, t,  $J$  8.9), 4.13 (2H, t,  $J$  8.9), 7.14-7.19 (m, 1H), 7.30-7.53 (4H, m), 7.61 (1H, d,  $J$  1.2), 7.61 (1H, d,  $J$  1.2) 7.64 (1H, d,  $J$  1.2), 9.48 (1H, br s,  $D_2O$  exch, NH);  $^{13}C$ -NMR (75MHz,  $CDCl_3$ )  $\delta$  18.8 ( $CH_2$ ), 49.7 ( $CH_2$ ), 112.3 (CH), 118.2 (Cq), 120.0 (CH), 120.2 (Cq), 120.4 (CH), 124.7 (Cq), 125.2 (CH), 126.1 (Cq), 127.0 (CH), 129.8 (CH), 131.9 (CH), 133.1 (CH), 137.1 (Cq), 139.1 (Cq), 155.5 (Cq), 196.4 (CO);  $m/z$  ( $ES^+$ ) 353 ( $MH^+$ );  $m/z$  ( $FAB^+$ ) 353 ( $MH^+$ ) (found:  $MH^+$ , 353.02897;  $C_{18}H_{14}BrN_2O$  requires 353.02892).

4) 1-(3-Bromobenzoyl)-3,4-dihydro- $\beta$ -carboline **5g**:

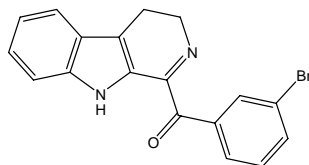

Bright orange solid, mp 118-119 °C (from EtOH); Found: C, 61.33; H, 3.78; N, 7.88 %. Calc. for  $C_{18}H_{13}BrN_2O$ : C, 61.21; H, 3.71; N, 7.93 %;  $\nu_{max}/cm^{-1}$  3454, 1654, 1538, 1179, 1148, 768, 740, 722;  $^1H$ -NMR (300 MHz,  $CDCl_3$ )  $\delta$  3.05 (2H, t,  $J$  8.9), 4.19 (2H, t,  $J$  8.9), 7.17 (1H, t,  $J$  7), 7.30-7.35 (1H, m), 7.38 (1H, d,  $J$  7.6), 7.44 (1H, dt,  $J$  0.9 and 8.5), 7.62 (1H, dq,  $J$  0.9, 8.2), 7.73 (1H, dq,  $J$  0.9 and 8.0), 8.11 (1H, dt,  $J$  1.3 and 7.6), 8.31 (1H, t,  $J$  1.7), 9.42 (br s, 1H,  $D_2O$  exch, NH).  $^{13}C$ -NMR (75MHz,  $CDCl_3$ )  $\delta$  19.0 ( $CH_2$ ), 49.3 ( $CH_2$ ), 112.3 (CH), 118.3 (Cq), 120.0 (CH), 120.4 (CH), 122.3 (Cq), 124.7 (Cq), 125.3 (CH), 126.3 (Cq), 129.7 (CH), 133.8 (CH), 134.0 (CH), 136.1 (CH), 137.0 (Cq), 137.1 (Cq), 155.5 (Cq), 191.7 (CO);  $m/z$  ( $FAB^+$ ) 353 ( $MH^+$ ) (found:  $MH^+$ , 352.02881;  $C_{18}H_{14}BrN_2O$  requires 353.02892).

5) 1-(4-Bromobenzoyl)-3,4-dihydro- $\beta$ -carboline **5h**:

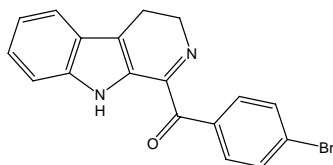

Orange solid, mp 125-127 °C (from EtOH/H<sub>2</sub>O); Found: C, 61.26; H, 3.84; N, 8.03 %. Calc. for C<sub>18</sub>H<sub>13</sub>BrN<sub>2</sub>O: C, 61.21; H, 3.71; N, 7.93 %;  $\nu_{\max}/\text{cm}^{-1}$  3447, 1655, 1551, 1540, 1186, 1174, 775, 746; <sup>1</sup>H-NMR (300 MHz, CDCl<sub>3</sub>)  $\delta$  3.02 (2H, t, *J* 8.9), 4.17 (2H, t, *J* 8.9), 7.16 (1H, t, *J* 7.0), 7.31 (1H, t, *J* 7.0), 7.42 (1H, dt, *J* 0.9 and 8.3), 7.60-7.65 (3H, m), 8.07 (2H, dt, *J* 2.0 and 8.8), 9.41 (br s, 1H, D<sub>2</sub>O exch, NH); <sup>13</sup>C-NMR (75MHz, CDCl<sub>3</sub>) 19.0 (CH<sub>2</sub>), 49.3 (CH<sub>2</sub>), 112.3 (CH), 118.3 (Cq), 120.0 (CH), 120.4 (CH), 124.7 (Cq), 125.3 (CH), 126.5 (Cq), 128.9 (Cq), 131.5 (2xCH), 132.6 (2xCH), 134.1 (Cq), 137.0 (Cq), 155.7 (Cq), 192.1 (CO); *m/z* (ES<sup>+</sup>) 353 (MH<sup>+</sup>); *m/z* (FAB<sup>+</sup>) 353 (MH<sup>+</sup>) (found: MH<sup>+</sup>, 353.02895; C<sub>18</sub>H<sub>14</sub>BrN<sub>2</sub>O requires 353.02892).

6) 1-Benzoyl- $\beta$ -carboline **6a**:

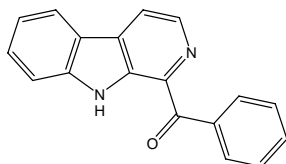

Yellow solid, mp 134-135 °C (from EtOH/H<sub>2</sub>O), (Found: C, 79.49; H, 4.50; N, 10.19%. Calc. for C<sub>18</sub>H<sub>12</sub>N<sub>2</sub>O: C, 79.40; H, 4.44; N, 10.29 %);  $\nu_{\max}/\text{cm}^{-1}$  3415, 3052, 1634, 1618, 1594, 1572; <sup>1</sup>H-NMR (300 MHz, CDCl<sub>3</sub>)  $\delta$  7.28 (1H, ddd, *J* 8.0, 5.1, 2.9), 7.44-7.56 (5H, m), 8.10-8.13 (2H, m), 8.24-8.27 (2H, m), 8.54 (1H, d, *J* 5.0), 10.38 (1H, br s, NH); <sup>13</sup>C-NMR (75MHz, CDCl<sub>3</sub>)  $\delta$  195.3 (Cq), 141.0 (Cq), 137.9 (CH), 137.5 (Cq), 137.2 (Cq), 136.2 (Cq), 132.3 (CH), 131.5 (Cq), 131.2 (CH), 129.1 (CH), 128.0 (CH), 121.6 (CH), 120.7 (Cq), 120.6 (CH), 118.4 (CH), 111.9 (CH); (ES<sup>+</sup>) 273 (MH<sup>+</sup>, 100%).

8) 1-(2-Fluorobenzoyl)- $\beta$ -carboline **6b**:

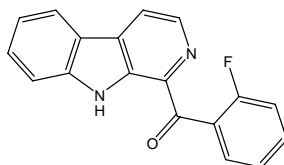

Slightly yellow solid, mp 194-196 °C (from EtOH); Found: C, 74.31; H, 3.82; N, 9.53 %. Calc. for C<sub>18</sub>H<sub>11</sub>FN<sub>2</sub>O: C, 74.47; H, 3.82; N, 9.65 %;  $\nu_{\max}/\text{cm}^{-1}$  3397, 1647, 1446, 1428, 1204, 1062, 970, 750, 763, 736, 711; <sup>1</sup>H-NMR (300 MHz, CDCl<sub>3</sub>)  $\delta$  7.21 (1H, dt, *J* 0.9 and 8.5), 7.28 -7.39 (2H, m), 7.51-7.61 (1H, m), 7.62 (1H, d, *J* 0.9), 7.63 (1H, q, *J* 0.9), 7.78 (1H, dt, *J* 1.7 and 7.2), 8.16-8.20 (2H, m), 8.57 (1H, d, *J* 4.7), 10.39 (1H, br s, D<sub>2</sub>O exch, NH); <sup>13</sup>C-NMR (75MHz, CDCl<sub>3</sub>)  $\delta$  112.1 (CH), 116.2 (d, <sup>2</sup>*J*<sub>CF</sub> 21.5, CH), 119.1 (CH), 120.7 (Cq), 120.9 (CH), 121.9 (CH), 123.8 (d, <sup>4</sup>*J*<sub>CF</sub> 3.6, CH), 127.1 (d, <sup>2</sup>*J*<sub>CF</sub> 14.4, Cq), 129.4 (CH), 131.1 (CH), 131.7 (Cq), 132.9 (d, <sup>3</sup>*J*<sub>CF</sub> 8.4, CH), 135.8 (Cq), 136.7 (Cq), 138.7 (CH), 141.2 (Cq), 160.5 (d, <sup>1</sup>*J*<sub>CF</sub> 252.3, Cq), 195.5 (CO); *m/z* (ES<sup>+</sup>) 291 (MH<sup>+</sup>); *m/z* (FAB<sup>+</sup>) 291 (MH<sup>+</sup>) (found: MH<sup>+</sup>, 291.09331; C<sub>18</sub>H<sub>12</sub>FN<sub>2</sub>O requires 291.09334).

9) 1-(2-Chlorobenzoyl)- $\beta$ -carboline **6c**:

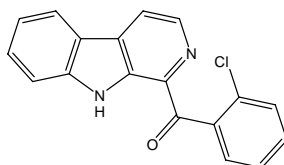

Orange solid, mp 203-204 °C (from acetone/H<sub>2</sub>O); Found: C, 70.36; H, 3.52; N, 9.07 %. Calc. for C<sub>18</sub>H<sub>11</sub>ClN<sub>2</sub>O: C, 70.48; H, 3.61; N, 9.13%;  $\nu_{\max}/\text{cm}^{-1}$  3421, 1645, 1286, 1206, 1061, 847, 763, 737, 710; <sup>1</sup>H-NMR (300 MHz, CDCl<sub>3</sub>)  $\delta$  7.35-7.39 (1H, m), 7.39 -7.50 (2 H, m), 7.50 -7.53 (1H, m), 7.58-7.65 (3H, m), 8.16 (1H, d, *J* 5.0), 8.19 (1H, t, *J* 7.9), 8.56 (1H, d, *J* 5.0), 10.42 (1H, br s, D<sub>2</sub>O exch, NH); <sup>13</sup>C-NMR (75MHz, CDCl<sub>3</sub>)  $\delta$  112.1 (CH), 119.2 (CH), 120.7 (Cq), 121.0 (CH), 121.9 (CH), 126.3 (CH), 129.4 (CH), 129.9 (CH), 130.0 (CH), 131.2 (CH), 131.8 (Cq), 131.8 (Cq), 135.5 (Cq), 136.8 (Cq), 138.4 (Cq), 138.8 (CH), 141.2 (Cq), 197.6 (CO); *m/z* (ES<sup>+</sup>) 307 (MH<sup>+</sup>); *m/z* (FAB<sup>+</sup>) 307 (MH<sup>+</sup>) (found: MH<sup>+</sup>, 307.06372; C<sub>18</sub>H<sub>12</sub>ClN<sub>2</sub>O requires 307.06379).

10) 1-(2-Bromobenzoyl)- $\beta$ -carboline **6d**:

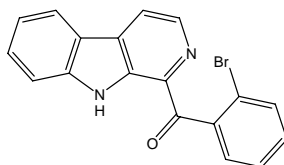

Orange solid, mp 215-216 °C (from EtOH/H<sub>2</sub>O); Found: C, 61.41; H, 3.09; N 7.92,. Calc. for C<sub>18</sub>H<sub>11</sub>N<sub>2</sub>OBr: C, 61.56; H, 3.16; N, 7.98%;  $\nu_{\max}/\text{cm}^{-1}$  3447, 1654, 1581, 1186, 1174, 950, 792, 775, 746; <sup>1</sup>H-NMR (300 MHz, CDCl<sub>3</sub>)  $\delta$  7.35-7.42 (2H, m), 7.47 (1H, dt, *J* 1.3 and 7.3), 7.56 (1H, dd, *J* 1.7 and 7.3), 7.63 (1H, d, *J* 0.9), 7.64 (1H, q, *J* 0.9), 7.69 (1H, dd, *J* 1.0 and 8.0), 8.16-8.20 (2H, m), 8.56 (1H, d, *J* 5) and 10.43 (1H, br s, D<sub>2</sub>O exch, NH); <sup>13</sup>C-NMR (75MHz, CDCl<sub>3</sub>)  $\delta$  112.1 (CH), 119.2 (CH), 120.1 (Cq), 120.7 (Cq), 121.0 (CH), 121.9 (CH), 126.9 (CH), 129.5 (CH), 129.8 (CH), 131.2 (CH), 131.9 (Cq), 133.1 (CH), 135.2 (Cq), 136.9 (Cq), 138.8 (CH), 140.4 (Cq), 141.2 (Cq), 198.2 (CO); *m/z* (ES<sup>+</sup>) 351 (MH<sup>+</sup>); *m/z* (FAB<sup>+</sup>) 351 (MH<sup>+</sup>) (found: MH<sup>+</sup>, 350.01321; C<sub>18</sub>H<sub>12</sub>BrN<sub>2</sub>O requires 351.01327).

11) 1-(2-Methoxybenzoyl)- $\beta$ -carboline **6f**:

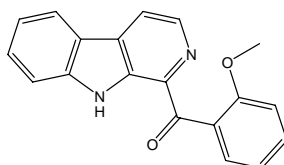

Slightly greenish solid, mp 183-184 °C (from EtOH); Found: C, 75.36; H, 4.56; N 9.18,. Calc. for C<sub>19</sub>H<sub>14</sub>N<sub>2</sub>O<sub>2</sub>: C, 75.48; H, 4.67; N, 9.27%;  $\nu_{\max}/\text{cm}^{-1}$  3406, 1646, 1245, 1205, 966, 753, 745, 724; <sup>1</sup>H-NMR (300 MHz, CDCl<sub>3</sub>)  $\delta$  3.77 (3H, s), 7.08 (1H, t, *J* 8.5), 7.10 (1H, t, *J* 7.3), 7.31-7.39 (1H, m), 7.48-7.59 (2H, m), 7.61-7.63 (2H, m), 8.13 (1H, d, *J* 5.0), 8.17 (1H, dd, *J* 0.9 and 7.9), 8.53 (1H, d, *J* 5.0), 10.43 (1H, br s, D<sub>2</sub>O exch, NH). <sup>13</sup>C-NMR (75MHz, CDCl<sub>3</sub>)  $\delta$  55.8 (CH<sub>3</sub>), 111.8 (CH), 112.1 (CH), 118.6 (CH), 120.3 (CH), 120.7 (CH), 120.7 (Cq), 121.7 (Cq), 121.8 (CH), 128.7 (Cq), 129.2 (CH), 130.1 (CH), 131.6 (Cq), 132.0 (CH), 136.5 (Cq), 138.5 (CH), 141.2 (Cq), 157.9 (Cq), 198.7 (CO), *m/z* (ES<sup>+</sup>) 303 (MH<sup>+</sup>); *m/z* (FAB<sup>+</sup>) 351 (MH<sup>+</sup>) (found: MH<sup>+</sup>, 303.11330; C<sub>19</sub>H<sub>15</sub>N<sub>2</sub>O<sub>2</sub> requires 303.11333).

12) 1-(3-Bromobenzoyl)- $\beta$ -carboline **6g**:

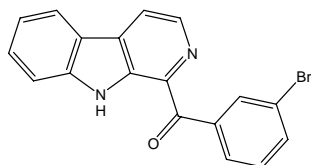

Yellow solid, mp 176-177 °C (from acetone); Found: C, 61.64; H, 3.07; N 7.94,. Calc. for  $C_{18}H_{11}N_2OBr$ : C, 61.56; H, 3.16; N, 7.98%;  $\nu_{max}/cm^{-1}$  3393, 1648, 1624, 1433, 1209, 842, 790, 745;  $^1H$ -NMR (300 MHz,  $CDCl_3$ )  $\delta$  7.34-7.38 (m, 1H), 7.41 (q, 1H,  $J$  7.9), 7.62-7.64 (m, 2H), 7.73 (dq, 1H,  $J$  1.0 and 7.9 Hz), 8.18 (dd, 1H,  $J$  0.9 and 2.9), 8.20 (s, 1H), 8.28 (dt, 1H,  $J$  1.5 and 7.9), 8.49 (t, 1H,  $J$  1.5), 8.62 (d, 1H,  $J$  4.7), 10.42 (1H, br s,  $D_2O$  exch, NH);  $^{13}C$ -NMR (75MHz,  $CDCl_3$ )  $\delta$  112.0 (CH), 118.8 (CH), 120.8 (Cq), 120.9 (CH), 121.8 (CH), 122.2 (Cq), 129.4 (CH), 129.6 (CH), 129.9 (CH), 131.8 (Cq), 134.0 (CH), 135.1 (CH), 135.72 (Cq), 137.3 (Cq), 138.2 (CH), 139.3 (Cq), 141.0 (Cq), 193.7 (CO);  $m/z$  ( $ES^+$ ) 351 ( $MH^+$ );  $m/z$  ( $FAB^+$ ) 351 ( $MH^+$ ) (found:  $MH^+$ , 351.01341;  $C_{18}H_{12}BrN_2O$  requires 350.01327).

13) 1-(4-Bromobenzoyl)- $\beta$ -carboline **6h**:

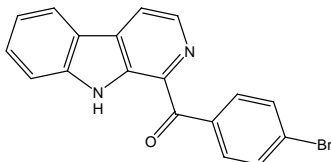

Yellow solid, mp 195-196 °C (from EtOH/ $H_2O$ ); Found: C, 61.39; H, 3.26; N 7.87,. Calc. for  $C_{18}H_{11}N_2OBr$ : C, 61.56; H, 3.16; N, 7.98%;  $\nu_{max}/cm^{-1}$  3382, 1643, 1626, 1427, 1212, 966, 832, 792, 740;  $^1H$ -NMR (300 MHz,  $CDCl_3$ )  $\delta$  7.38 (1H, sep,  $J$  2.6), 7.63 (1H, d,  $J$  0.9), 7.65 (1H, dd,  $J$  0.9 and 2.3), 7.7 (2H, d,  $J$  8.8), 8.19 (1H, q,  $J$  0.9), 8.21 (1H, q,  $J$  0.9), 8.25 (1H, d,  $J$  2.2), 8.28 (1H, d,  $J$  2.2), 8.63 (1H, d,  $J$  5.0), 10.44 (1H, br s,  $D_2O$  exch, NH).  $^{13}C$ -NMR (75MHz, DMSO)  $\delta$  113.0 (CH), 119.1 (CH), 120.0 (Cq), 120.2 (CH), 121.8 (CH), 126.34 (Cq), 130.0 (CH), 129.0 (Cq), 131.0 (2xCH), 131.1 (Cq), 132.8 (2xCH), 135.8 (Cq), 136.4 (Cq), 137.2 (CH), 141.7 (Cq), 192.6 (CO);  $m/z$  ( $ES^+$ ) 351 ( $MH^+$ );  $m/z$  ( $FAB^+$ ) 351 ( $MH^+$ ) (found:  $MH^+$ , 351.01323;  $C_{18}H_{12}BrN_2O$  requires 351.01327).
